# Supplementary material for: Effect of ferrous iron on the nucleation and growth of CaCO3in slightly basic aqueous solutions
Source: Royal Society of Chemistry journal article supplement (doi:10.1039/c6ce02290a), 2016-12-09
Supplement: c6ce02290a2.pdf [file c6ce02290a2.pdf]

CrystEngComm

Electronic Supplementary Information

## Effect of ferrous iron on the nucleation and growth of CaCO<sub>3</sub> in slightly basic aqueous solutions

Fulvio Di Lorenzo,<sup>\*a</sup> Alejandro Burgos-Cara,<sup>bc</sup> Encarnación Ruiz-Agudo,<sup>b</sup> Christine V. Putnis<sup>cd</sup> and Manuel Prieto<sup>a</sup>

| Ca <sub>T</sub> /Fe <sub>T</sub> | REACTOR<br>C <sup>IV</sup> (pH = 8.5) | REACTOR<br>CaCl <sub>2</sub> | REACTOR<br>FeCl <sub>2</sub> | REACTANT 1<br>C <sup>IV</sup> (pH = 9) | REACTANT 2<br>[CaCl <sub>2</sub> ], [FeCl <sub>2</sub> ] | pH  | Ω <sub>calcite</sub> |
|----------------------------------|---------------------------------------|------------------------------|------------------------------|----------------------------------------|----------------------------------------------------------|-----|----------------------|
| No iron                          | 11.5 mM                               | 0.285 mM                     | 0                            | 152 mM                                 | 71.285 mM                                                | 8.5 | 6.46                 |
| 100                              | 11.5 mM                               | 0.285 mM                     | 2.85 μM                      | 152 mM                                 | 71.285 mM<br>0.0057 mM                                   | 8.5 | 6.46                 |
| 50                               | 11.5 mM                               | 0.285 mM                     | 5.7 μM                       | 152 mM                                 | 71.285 mM<br>0.0114 mM                                   | 8.5 | 6.46                 |
| 25                               | 11.5 mM                               | 0.285 mM                     | 11.4 μM                      | 152 mM                                 | 71.285 mM<br>0.0228 mM                                   | 8.5 | 6.46                 |

Table S1. Solution compositions used for the growth experiments according to the constant composition method.

| Ca <sub>T</sub> /Fe <sub>T</sub> | NaHCO <sub>3</sub> | CaCl <sub>2</sub> | FeCl <sub>2</sub> | pH  | Ω <sub>calcite</sub> / SI <sub>calcite</sub> |
|----------------------------------|--------------------|-------------------|-------------------|-----|----------------------------------------------|
| no iron                          | 26 mM              | 0.33 mM           | 0                 | 8.1 | 5.89 / 0.77                                  |
| 100                              | 26 mM              | 0.33 mM           | 0.0033 mM         | 8.1 | 5.89 / 0.77                                  |
| 50                               | 26 mM              | 0.33 mM           | 0.0066 mM         | 8.1 | 5.75 / 0.76                                  |
| 25                               | 26 mM              | 0.33 mM           | 0.01319 mM        | 8.1 | 5.75 / 0.76                                  |
| 12.5                             | 26 mM              | 0.33 mM           | 0.0264 mM         | 8.1 | 5.75 / 0.76                                  |

Table S2. Composition of solutions flowed over calcite surfaces during *in situ* AFM experiments.

## Nucleation experiments

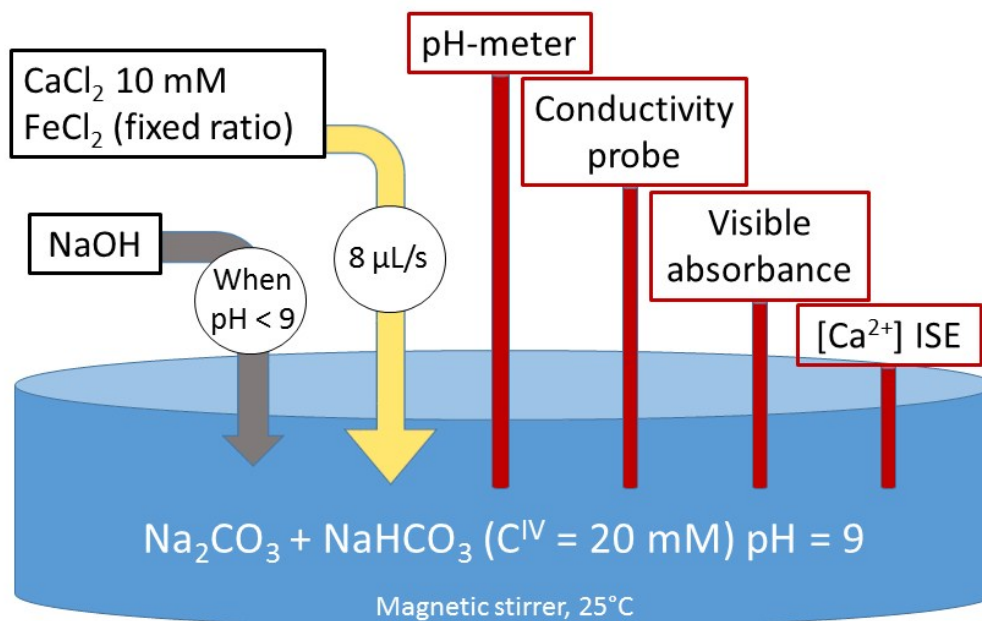

Fig. S1 Schematic representation of the experimental setup used during nucleation experiments.

## Growth experiments

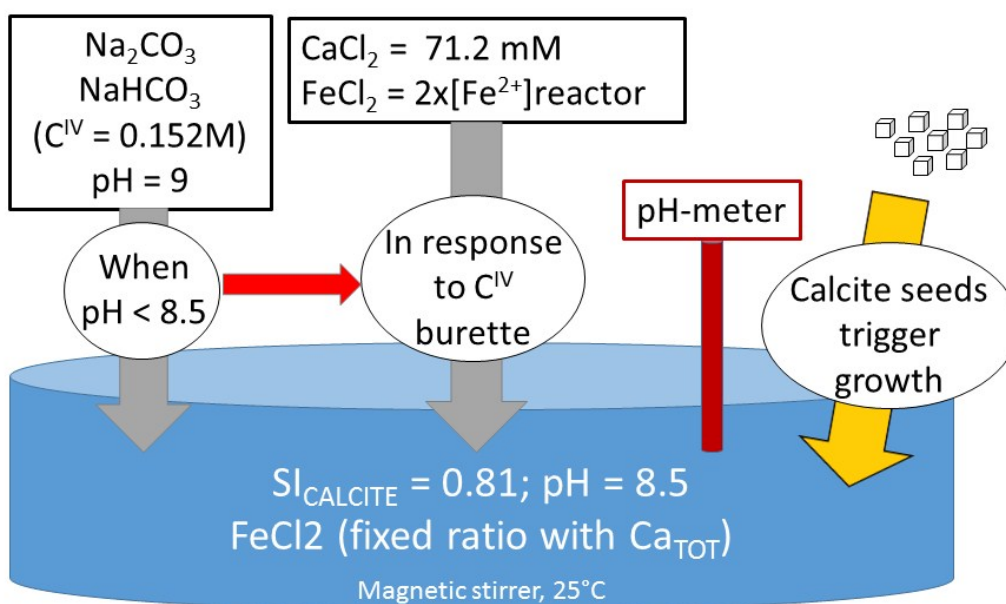

Fig. S2 Schematic representation of the experimental setup used during growth experiments.

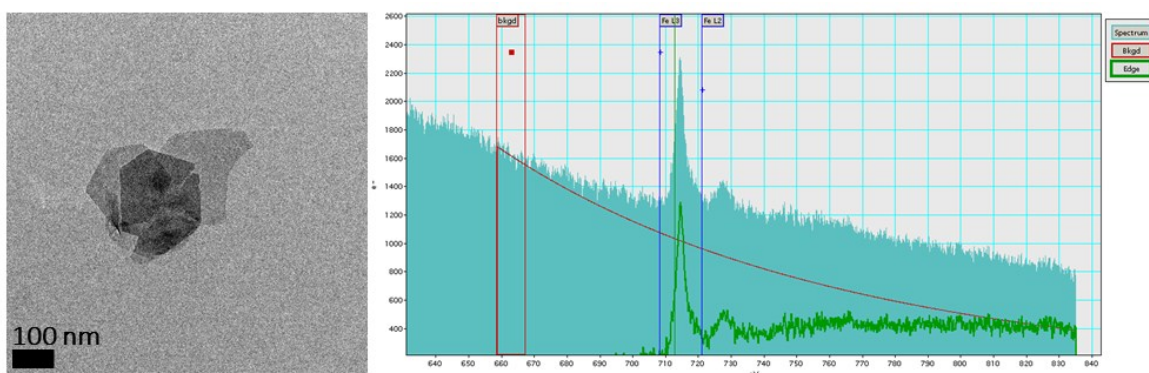

Fig. S3 Electron energy loss spectroscopy (EELS) analysis of the secondary phase founded in the sample from a nucleation experiment  $\text{Ca}_7/\text{Fe}_7 = 5$ . The presence of secondary phase with hexagonal shape was observed in several Fe-bearing experiments by SEM, FESEM, EMPA or TEM analysis. The analysis of Fe  $L_{2,3}$ -edge spectra revealed a proportion of  $\text{Fe}^{2+} \approx 80\%$  ( $\text{Fe}^{3+} \approx 20\%$ ) confirming that ferrous iron remained the most abundant valence state for iron in our system.

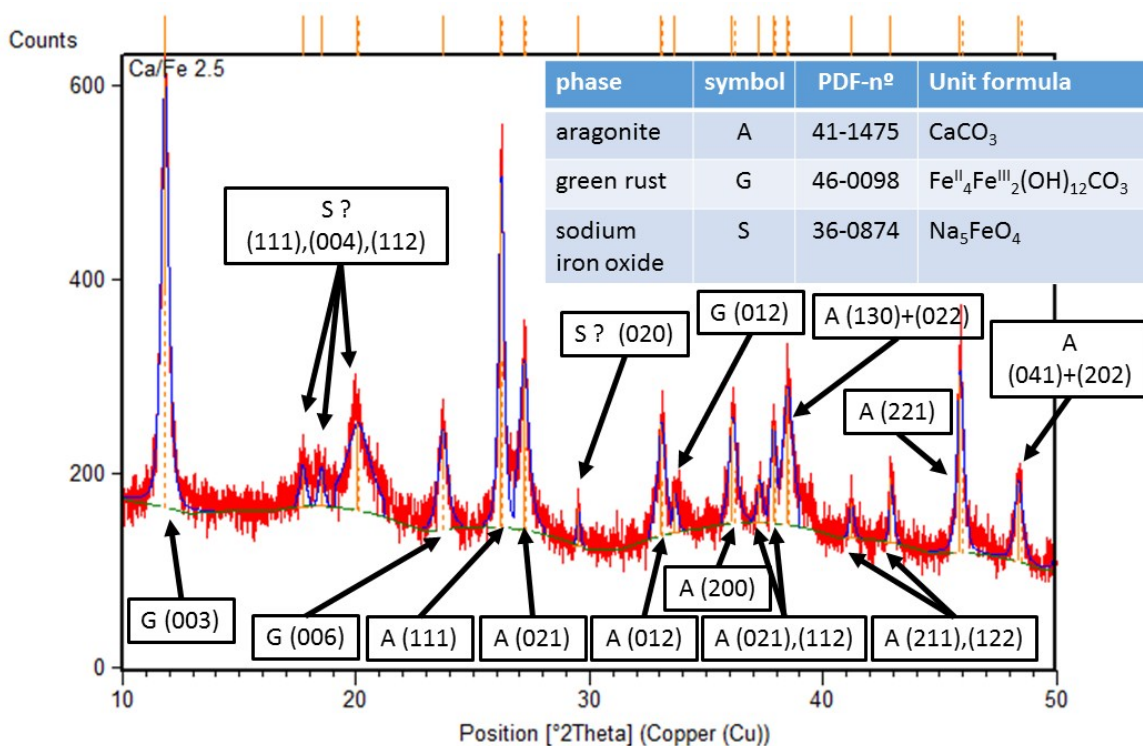

Fig. S4 XRD pattern of the solid product from a nucleation experiment ( $\text{Ca}_7/\text{Fe}_7 = 2.5$ ), reflections belonging to aragonite and to green rust are indexed. Unindexed lines have been assigned to sodium iron oxide because it was the only Fe-bearing compound (in the PDF-2 database) with intense reflections in the region 18-20  $[2\theta, \text{Cu-K}\alpha]$ .
